# Supplementary material for: MiR-155 deficiency protects renal tubular epithelial cells from telomeric and genomic DNA damage in cisplatin-induced acute kidney injury
Source: PubMed Central journal article supplement (PMC9254246; doi:10.7150/thno.72456), 2022-06-06

**Figure S1**

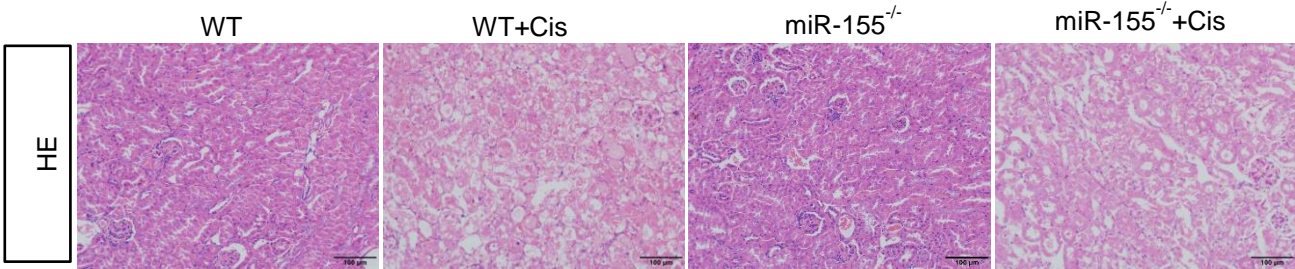

Figure S1. Representative kidney histology as shown by HE staining 72 h after saline or cisplatin injection.

**Figure S2**

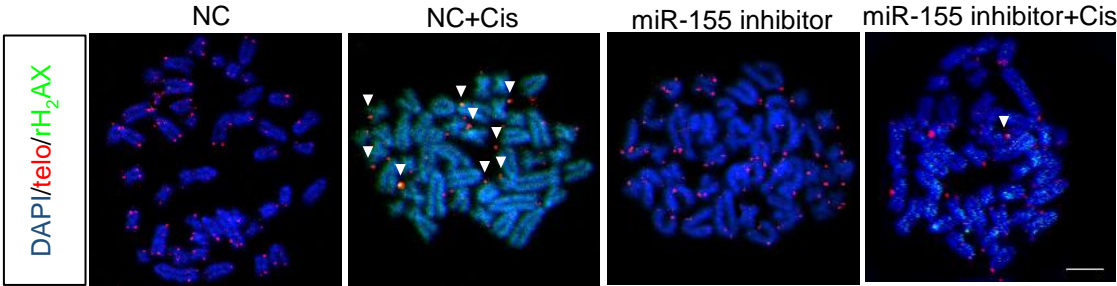

Figure S2. Telomere DNA damage in TECs treated with cisplatin, as demonstrated by the co-localization of  $\gamma$ H2AX (green) and telomeres (red) in the immunofluorescence. White arrows indicate TIFs. Scale bars: 10  $\mu$ m. TIFs, telomere dysfunction induced foci.

**Figure S3**

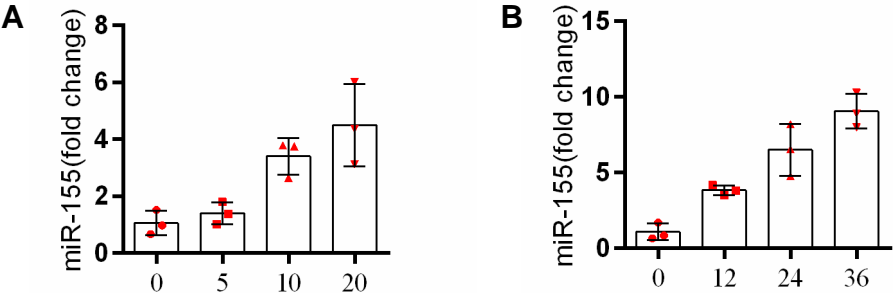

Figure S3. (A) qPCR of miR-155 in HK-2 cells (n = 3). HK-2 cells were treated with cisplatin 0, 5, 10, 20  $\mu$ M for 24 h. (B) qPCR of miR-155 in HK-2 cells (n = 3). HK-2 cells were treated with cisplatin 20  $\mu$ M for 0, 12, 24, 36 h.

**Figure S4**

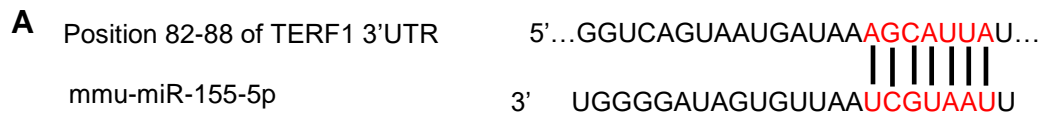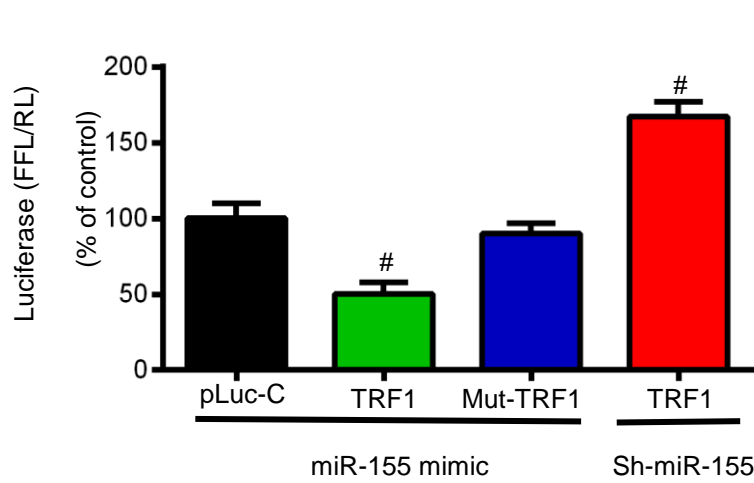

Figure S4. mmu-miR-155 targets TRF1. (A) The schematic diagram depicted the predicted binding site of mmu-miR-155 targeting the 3'-UTR of TRF1. (B) Luciferase reporter assay determined TRF1 as a bona fide target of miR-155 (n = 3). pLuc-ctrl (pMIR-REPORT luciferase); Mut, mutant; The data represent the mean  $\pm$  SD; # P < 0.05 versus mimic control.

**Unedited images for figure 2C**

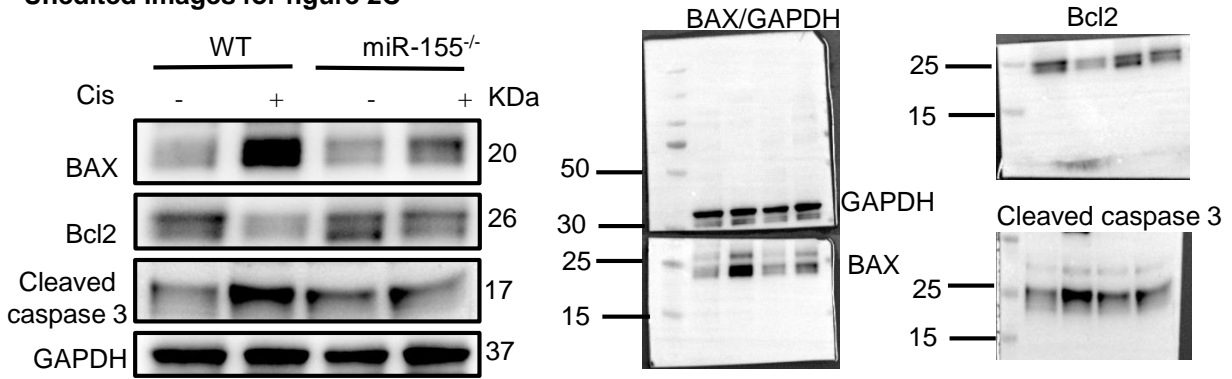

**Unedited images for figure 2I**

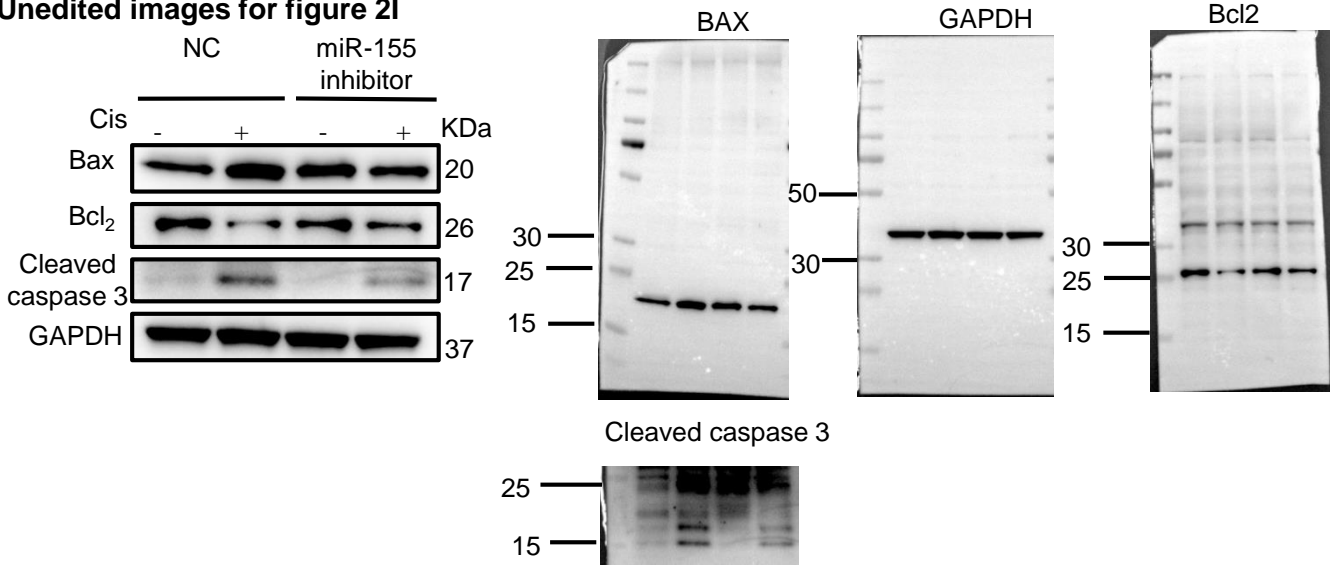

Original data 2.

**Unedited images for figure 3C**

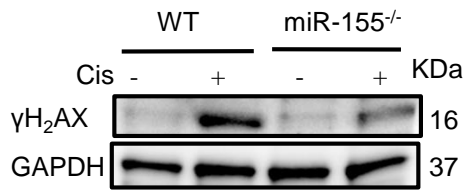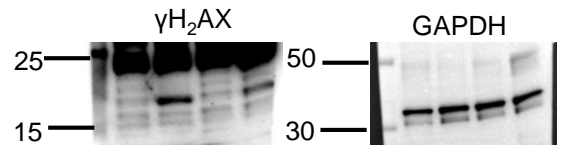

**Unedited images for figure 3G**

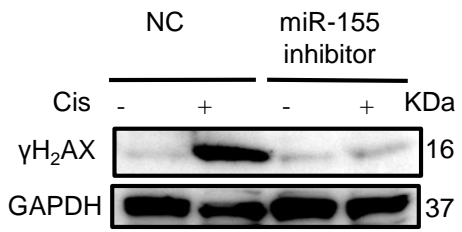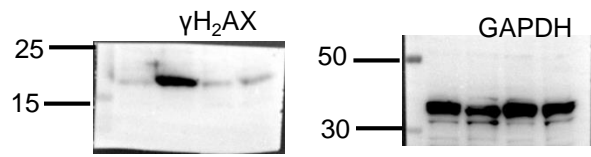

Original data 3.

**Unedited images for figure 5C**

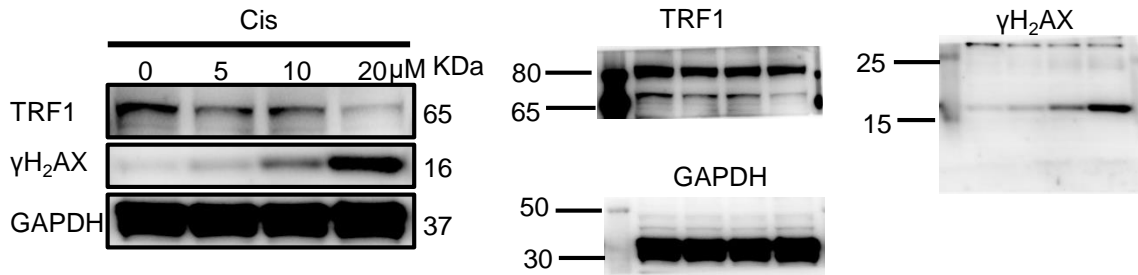

**Unedited images for figure 5F**

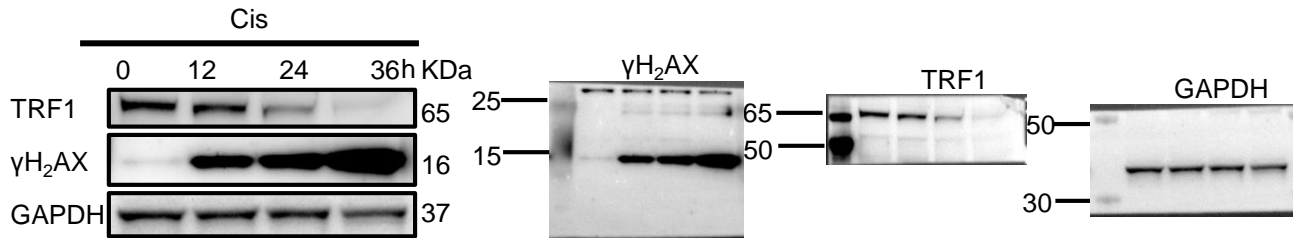

**Unedited images for figure 5K**

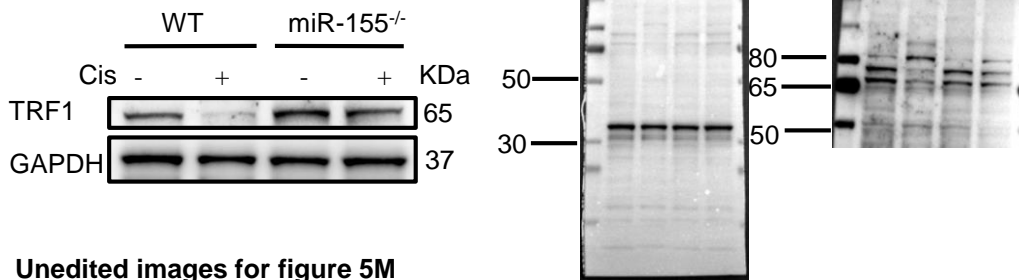

**Unedited images for figure 5M**

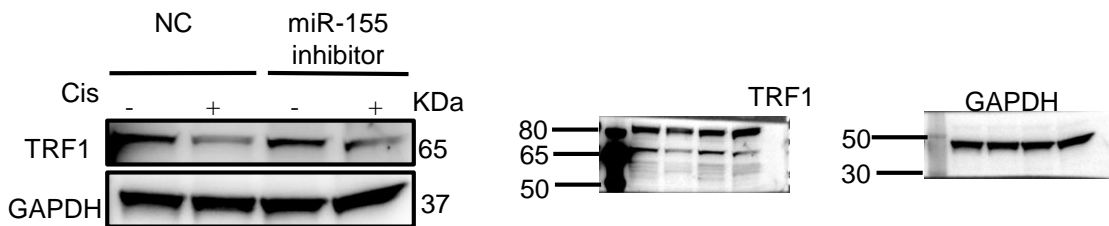

**Unedited images for figure 5R**

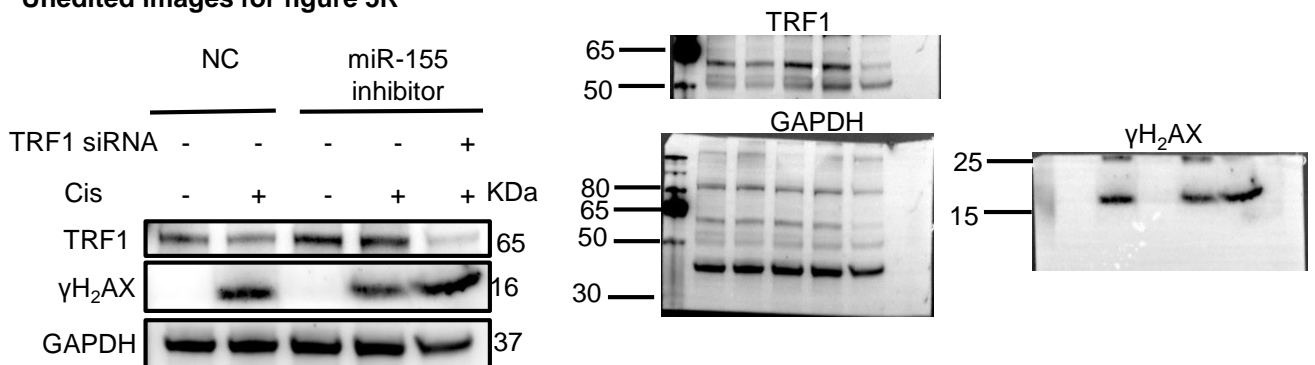

Original data 4.

**Unedited images for figure 6C**

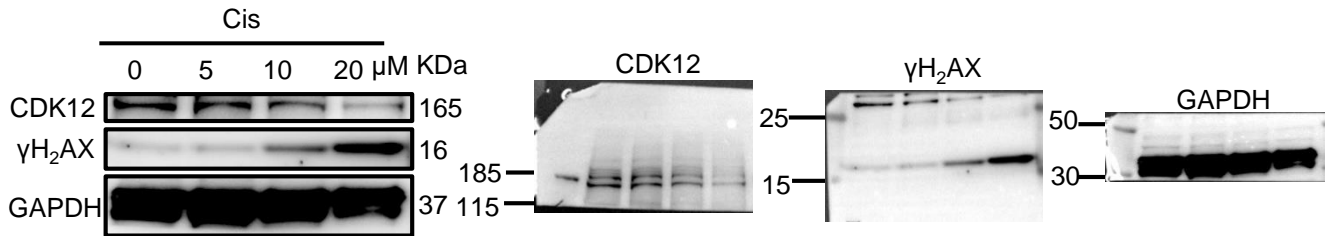

**Unedited images for figure 6F**

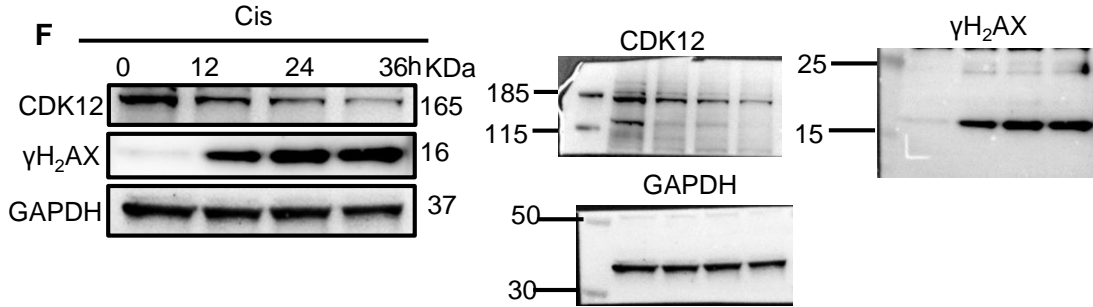

**Unedited images for figure 6I**

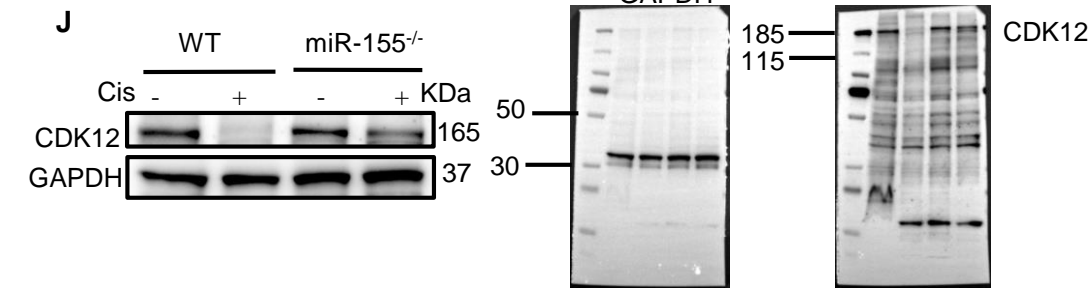

**Unedited images for figure 6M**

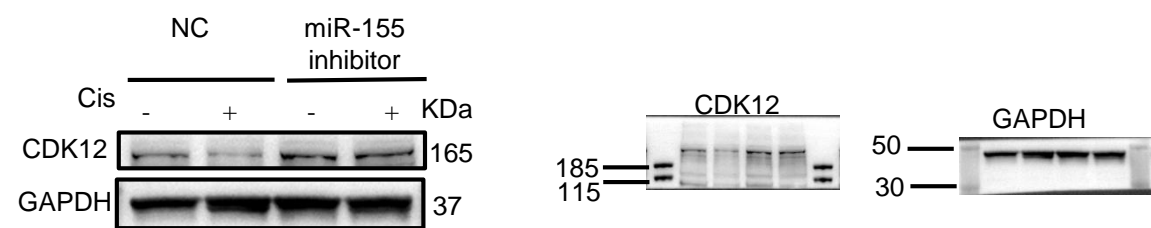

**Unedited images for figure 6Q**

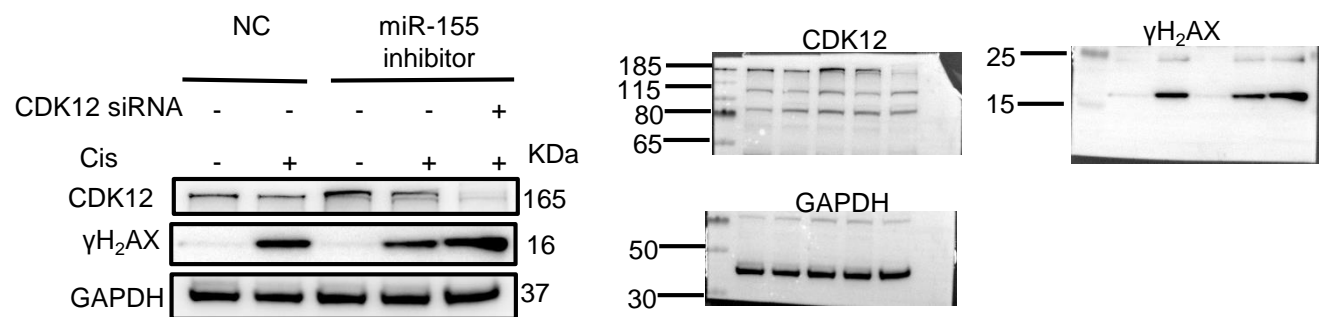

Supplement: thnov12p4753s1.pdf [file thnov12p4753s1.pdf]
